# Supplementary material for: An Investigation of Knee Injury Profiles among Iranian Elite Karatekas: Observations from a Cross-Sectional Study
Source: Int J Environ Res Public Health. 2021 Jun 27;18(13):6888. doi: 10.3390/ijerph18136888 (PMC8296942; doi:10.3390/ijerph18136888)
Supplement: Supplementary file 1 [file ijerph-18-06888-s001.zip › C-NO-3.pdf]

**Knee Outcome Survey Activities of Daily Living Scale (ADLS).**

**Symptoms:** To what degree does each of the following symptoms affect your level of activity? (check one answer on each line)

|                                                      | <b>I do not have the symptom</b> | <b>I have the symptom, but it does not affect my activity</b> | <b>The symptom affects my activity slightly</b> | <b>The symptom affects my activity moderately</b> | <b>The symptom affects my activity severely</b> | <b>The symptom prevents me from all daily activity</b> |
|------------------------------------------------------|----------------------------------|---------------------------------------------------------------|-------------------------------------------------|---------------------------------------------------|-------------------------------------------------|--------------------------------------------------------|
| <b>Pain</b>                                          |                                  |                                                               |                                                 |                                                   |                                                 |                                                        |
| <b>Stiffness</b>                                     |                                  |                                                               |                                                 |                                                   |                                                 |                                                        |
| <b>Swelling</b>                                      |                                  |                                                               |                                                 |                                                   |                                                 |                                                        |
| <b>Giving way, buckling, or shifting of the knee</b> |                                  |                                                               |                                                 |                                                   |                                                 |                                                        |
| <b>Weakness</b>                                      |                                  |                                                               |                                                 |                                                   |                                                 |                                                        |
| <b>Limping</b>                                       |                                  |                                                               |                                                 |                                                   |                                                 |                                                        |

**Functional Limitations With Activities of Daily Living:** How does your knee affect your ability to: (check one answer on each line)

|                                    | <b>Activity is not difficult</b> | <b>Activity is minimally difficult</b> | <b>Activity is somewhat difficult</b> | <b>Activity is fairly difficult</b> | <b>Activity is very difficult</b> | <b>I am unable to</b> |
|------------------------------------|----------------------------------|----------------------------------------|---------------------------------------|-------------------------------------|-----------------------------------|-----------------------|
| <b>Walk</b>                        |                                  |                                        |                                       |                                     |                                   |                       |
| <b>Go up stairs</b>                |                                  |                                        |                                       |                                     |                                   |                       |
| <b>Go down stairs</b>              |                                  |                                        |                                       |                                     |                                   |                       |
| <b>Stand</b>                       |                                  |                                        |                                       |                                     |                                   |                       |
| <b>Kneel on front of your knee</b> |                                  |                                        |                                       |                                     |                                   |                       |
| <b>Squat</b>                       |                                  |                                        |                                       |                                     |                                   |                       |
| <b>Sit with your knee bent</b>     |                                  |                                        |                                       |                                     |                                   |                       |
| <b>Rise from a chair</b>           |                                  |                                        |                                       |                                     |                                   |                       |

**Scoring:** The first column is scored 5 points for each item, followed in successive columns by scores of 4, 3, 2, 1, and 0 for the last column. The total points from all items are summed, then divided by 70 and multiplied by 100 for the ADLS score. For example, if the individual places marks for 12 items in the first column, and 2 items in the second column the total points would be  $12 \times 5 = 60$  points, plus  $2 \times 4 = 8$  points, for a total of 68 points. The ADLS score would then be  $68/70 \times 100 = 97\%$ .

**Global Rating:** How would you rate your level of functioning during your usual daily activities on a scale from 0 to 100 with 100 being your level of function prior to your knee problem and 0 being the inability to perform any of your usually daily activities? \_\_\_\_ / 100 %

**Knee Outcome Survey Sports Activities Scale (SAS)**

**Symptoms:** To what degree does each of the following symptoms affect your level of sports activity?  
(Check ONE answer to each line)

|                                                       | <b>Never<br/>have</b> | <b>Have, But<br/>does not<br/>affect my<br/>sports<br/>activity</b> | <b>Affects my<br/>sport<br/>activity<br/>slightly</b> | <b>Affects<br/>sports<br/>activity<br/>moderately</b> | <b>Affects<br/>sports<br/>severely</b> | <b>Prevents me<br/>from all<br/>sports<br/>activity</b> |
|-------------------------------------------------------|-----------------------|---------------------------------------------------------------------|-------------------------------------------------------|-------------------------------------------------------|----------------------------------------|---------------------------------------------------------|
| <b>Pain</b>                                           |                       |                                                                     |                                                       |                                                       |                                        |                                                         |
| <b>Grinding or<br/>grating</b>                        |                       |                                                                     |                                                       |                                                       |                                        |                                                         |
| <b>Stiffness</b>                                      |                       |                                                                     |                                                       |                                                       |                                        |                                                         |
| <b>Swelling</b>                                       |                       |                                                                     |                                                       |                                                       |                                        |                                                         |
| <b>Slipping or<br/>partial giving<br/>way of knee</b> |                       |                                                                     |                                                       |                                                       |                                        |                                                         |
| <b>Buckling or full<br/>giving way</b>                |                       |                                                                     |                                                       |                                                       |                                        |                                                         |
| <b>Weakness</b>                                       |                       |                                                                     |                                                       |                                                       |                                        |                                                         |

**Functional Limitations with Sports Activities:** How does your knee affect your ability to: (Check ONE answer on each line)

|                                                   | <b>Not<br/>difficult<br/>at all</b> | <b>Minimally<br/>difficult</b> | <b>Somewhat<br/>difficult</b> | <b>Fairly<br/>difficult</b> | <b>Very<br/>difficult</b> | <b>Unable to do</b> |
|---------------------------------------------------|-------------------------------------|--------------------------------|-------------------------------|-----------------------------|---------------------------|---------------------|
| <b>Run straight<br/>ahead</b>                     |                                     |                                |                               |                             |                           |                     |
| <b>Jump and<br/>land on your<br/>involved leg</b> |                                     |                                |                               |                             |                           |                     |
| <b>Stop and start<br/>quickly</b>                 |                                     |                                |                               |                             |                           |                     |
| <b>Cut and pivot<br/>on your<br/>involved leg</b> |                                     |                                |                               |                             |                           |                     |

**Scoring:** The first column is scored 5 points for each item, followed in successive columns by scores of 4, 3, 2, 1, and 0 for the last column. The total points from all items are summed, then divided by 55 and multiplied by 100 for the SAS score. For example, if the individual places marks for 9 items in the first column, and 2 items in the second column the total points would be  $9 \times 5 = 45$  points, plus  $2 \times 4 = 8$  points, for a total of 53 points. The SAS score would then be  $53/55 \times 100 = 96\%$ .
